# Light-Dependent and Circadian Transcription Dynamics *In Vivo* Recorded with a Destabilized Luciferase Reporter in *Neurospora*

François Cesbron, Michael Brunner, Axel C. R. Diernfellner\*

University of Heidelberg Biochemistry Center (BZH), Im Neuenheimer Feld, Heidelberg, Germany

## Abstract

We show that firefly luciferase is a stable protein when expressed at 25°C in *Neurospora*, which limits its use as transcription reporter. We created a short-lived luciferase by fusing a PEST signal to its C-terminus (LUC-PEST) and applied the LUC-PEST reporter system to record *in vivo* transcription dynamics associated with the *Neurospora* circadian clock and its blue-light photosensory system over the course of several days. We show that the tool is suitable to faithfully monitor rapid, but also subtle changes in transcription in a medium to high throughput format.

**Citation:** Cesbron F, Brunner M, Diernfellner ACR (2013) Light-Dependent and Circadian Transcription Dynamics *In Vivo* Recorded with a Destabilized Luciferase Reporter in *Neurospora*. PLoS ONE 8(12): e83660. doi:10.1371/journal.pone.0083660

**Editor:** Nicholas S. Foulkes, Karlsruhe Institute of Technology, Germany

**Received:** September 17, 2013; **Accepted:** November 13, 2013; **Published:** December 31, 2013

**Copyright:** © 2013 Cesbron et al. This is an open-access article distributed under the terms of the Creative Commons Attribution License, which permits unrestricted use, distribution, and reproduction in any medium, provided the original author and source are credited.

**Funding:** This work was supported by grants from the Deutsche Forschungsgemeinschaft: DFG DI 1874/1-1 to AD (<http://www.dfg.de>). The funders had no role in study design, data collection and analysis, decision to publish, or preparation of the manuscript.

**Competing Interests:** The authors have declared that no competing interests exist.

\* E-mail: [axel.diernfellner@bzh.uni-heidelberg.de](mailto:axel.diernfellner@bzh.uni-heidelberg.de)

## Introduction

Firefly luciferase from *Photinus pyralis* is a highly sensitive reporter for monitoring gene expression activity in a variety of organisms [1,2,3,4,5]. In contrast to fluorescence, luciferase does not require light irradiation for excitation and is thus neither subject to photobleaching nor phototoxicity. Hence, luciferase is a suitable reporter for long term *in vivo* measurements that are extensively used to record and monitor circadian clock activity in bacteria, fungi, plants, flies and mammals [3,6,7,8,9].

Circadian clocks are self-sustained molecular oscillators that are dependent on interconnected transcriptional and posttranscriptional negative feedback loops [10]. In *Neurospora*, the circadian transcription factor WHITE COLLAR COMPLEX (WCC) controls rhythmic expression of FREQUENCY (FRQ), which in turn inhibits the WCC in a negative feedback loop [11,12,13,14]. The WCC is also directly activated by light via its LOV-photoreceptor domain [15]. In light-dark cycles the activity of the WCC is additionally attenuated by the LOV-photoreceptor VIVID [16,17,18], which directly interferes with light-dependent dimerization of the WCC via LOV-LOV interactions [15]. These feedback loops support rhythmic transcription of *frq* and other clock-controlled genes in constant darkness and also in light-dark cycles.

A *Neurospora* reporter assay based on a codon-optimized luciferase gene allows to record circadian genes expression rhythms *in vivo* over the course of several days [19]. The stability of firefly luciferase is temperature dependent [20,21]. In mammalian cells at 37°C luciferase is degraded with a half-time of about 3–4 h [22]. Addition of a PEST sequence significantly destabilizes luciferase [23], rendering it more suitable as a reporter for dynamic processes on a short time-scale.

We show here that luciferase is extremely stable ( $t_{1/2} \sim 8$  h) in *Neurospora*, which is generally cultured at 25°C. The pronounced stability of luciferase at 25°C limits its use as a reporter for dynamic transcription processes. Addition of a PEST sequence accelerates the turnover of luciferase in *Neurospora* by more than one order of magnitude. We show that the destabilized LUC-PEST protein ( $t_{1/2} \sim 25$  min) is a faithful reporter of promoter activity that readily uncovers rapid and considerably complex transcriptional dynamics.

## Materials and Methods

### Neurospora Strains and Culture Conditions

*Neurospora* strains carried the *ras-1<sup>bd</sup>* mutation [24]. For transformations, *ras-1<sup>bd</sup>*; *his-3* [25] and *ras-1<sup>bd</sup>*;  $\Delta$ *vd*; *his-3* [15] were used. Standard growth medium contained 2% glucose, 0.5% L-arginine, 1× Vogel's. When indicated, 10 µg/mL CHX was used.

### Plasmid Construction and Neurospora Transformation

A *Neurospora* codon optimized PEST sequence (synthesized by GenScript) was inserted in front of the luciferase STOP codon in pFH62 *luc* (pBM60-*luc-trpC*, [26]) via a genetically engineered BglII site. The *frq* promoter and the *vd* promoter, respectively, were amplified by PCR and inserted into via BamHI/NotI and EcoRI/NotI, respectively, into pFH62 *lucPEST*. *Neurospora* conidia were transformed as described [27]. The *his-3* locus was used for genomic integration of the plasmids by homologous recombination.

Codon optimized PEST sequence:

5'-TCC CAC GGC TTC CCC CCC GAG GTC GAG GAG  
CAG GCC GCC GGC ACC CTC CCC ATG AGC TGC GCC

CAG GAG AGC GGC ATG GAC AGG CAC CCC GCC GCC  
TGC GCC AGC GCC AGG ATC AAC GTC TAA -3'

Primers:

frqprom\_fwd 5'-aaagatccgggatagcagagaacctcaatctc-3',  
frqprom\_rev 5'-aaagcggccgatcgacaatcgattccgga-3',  
vvdprom\_fwd 5'-tttgaattcgggtccattggtcttggtg-3',  
vvdprom\_rev 5'-gcgcccgctgctggttatgagacagtg-3'.

### RNA Analysis

RNA was prepared with peqGOLD TriFAST (peqLab, Erlangen, Germany) and reverse transcribed with the Maxima First Strand cDNA Synthesis Kit (Fermentas). Transcript levels were analyzed by quantitative real-time PCR in 96-well plates with the StepOnePlus Real-Time PCR System (Applied Biosystems). TaqMan Gene Expression Master Mix (Applied Biosystems) and was used with gene-specific primers and probes [13].

### In vivo Luciferase Measurements

Sorbose medium containing 1× FGS (0.05% fructose, 0.05% glucose, 2% sorbose), 1× Vogels, 1% agarose, 10 ng/ml biotin and 150 μM firefly luciferin was used for the assessment of the luciferase rhythms. 96-well plates were inoculated with 3×10<sup>4</sup> conidia per well and incubated in DD at 25°C. Bioluminescence was recorded in DD or LD at 25°C with an EnVision Xcite Multilabel Reader (Perkin Elmer). The light intensity used in LD cycles was 40 μE.

Light pulse assay (Fig. 1C): liquid standard growth medium contained 2% glucose, 0.5% L-arginine, 1× Vogel's and 150 μM firefly luciferin. 96-well plates were inoculated with 1.5×10<sup>5</sup> conidia per well and incubated in DD for 1 day at 25°C. Plates were then exposed to a 1 min light pulse (80 μE) before bioluminescence was recorded in DD at 25°C.

### In vitro Luciferase Measurements

10 μl protein extract (10 μg/μl), prepared as described [27], and 30 μl reaction buffer (10 mM luciferin, 3 mM ATP, 15 MgSO<sub>4</sub>, 50 mM Hepes pH 7.5) were combined in a 96-well plate and bioluminescence was measured with an EnVision Xcite Multilabel Reader.

## Results

### A PEST Signal Destabilizes Luciferase in *Neurospora*

In order to decrease the half-life of firefly luciferase (LUC) a PEST-encoding DNA template [23] was codon optimized for *Neurospora* and fused to the 3' end of the codon-optimized *luc* ORF [19]. The *luc-PEST* fusion gene was expressed in *Neurospora* under the control of the *frequency* (*frq*) promoter (Fig. 1A). LUC-PEST was expressed at ~10-fold lower level than unmodified LUC (Fig. 1B left), suggesting that the protein is unstable. To assess the destabilizing effect of the PEST-tag liquid cultures of strains expressing LUC and LUC-PEST, respectively, were treated with the translation inhibitor cycloheximide (CHX). Mycelia were then harvested over a time course of 8 h and luciferase activity (bioluminescence) was measured *in vitro* in protein extracts prepared from these samples. Under these conditions LUC-PEST was rapidly degraded with a half-time ( $t_{1/2}$ ) of ~25 min while unmodified LUC was slowly degraded with an apparent  $t_{1/2}$ >8 h, (Fig. 1B right). Thus, the PEST-tag accelerates the turnover kinetics of the protein by more than one order of magnitude.

The rapid degradation of LUC-PEST prompted us to investigate the response of the *frq* promoter to a short light pulse (80 μE, 1 min). *frq* mRNA peaked about 15 minutes after the light pulse and decreased to baseline levels after ~2 h (Fig. 1C, orange

line). Bioluminescence supported by *frq::luc-PEST* reached its peak 40–60 minutes after the light pulse and then decreased to baseline levels after ~3.5 h. In contrast, the activity of the stable luciferase supported by *frq::luc* peaked after 2 h and levels did not drop significantly over the course of five hours. The data highlights the usefulness of both, stable and unstable reporters. The *frq::luc-PEST* reporter activity reflects with a rather short delay the transcriptional dynamics of the *frq* promoter, while the activity of *frq::luc* corresponds, due to the pronounced stability of LUC, to a temporal integration of the produced mRNA molecules.

### Free-running *frq* Transcription Rhythms

We compared the circadian luciferase activity rhythms supported by the *frq::luc* and *frq::luc-PEST* reporters. The corresponding strains were cultured under restricted growth conditions (sorbose-containing solid growth medium), which allow life-cell measurements over extended time periods in a 96-well plate format. In constant darkness (DD) both reporters oscillated robustly with a free running period of ~23 h (Fig. 2A). However, the amplitude (peak:trough ratio) supported by *frq::luc-PEST* was substantially higher than the amplitude of the *frq::luc* strain (6-fold versus 2.3-fold). Thus, the *luc-PEST* reporter appears to be more sensitive and may thus be suitable for recording of low amplitude promoter activity rhythms that would be masked by stable luciferase.

### Entrained *frq* Transcription Rhythms

A key property of circadian clocks is their responsiveness to environmental cues such as light [28,29,30]. We recorded the activity of *frq::luc-PEST* and *frq::luc* strains grown under a 12 h light/12 h dark (LD) cycle (Fig. 2B). In this artificial square wave light/dark regime LUC-PEST activity reached a maximum rapidly after lights-on and then adapted within a few hours at a high steady-state levels. After light-to-dark transition LUC-PEST levels decreased quickly, reaching trough levels about 2–3 h after lights-off. The peak:trough expression ratio supported by *frq::luc-PEST* was ~20-fold. This activity profile of *frq::luc-PEST* corresponds closely to the previously reported temporal expression profile of *frq* RNA in light/dark cycles [31,32], indicating that the destabilized luciferase is a faithful reporter of the transcription dynamics of the *frq* promoter. In contrast, the activity of the stable luciferase encoded by *frq::luc* increased steadily throughout the light phase and then decreased during the dark phase. The peak:trough ratio of the luc activity was about 2-fold. The temporal activity profile of *frq::luc* does not resemble the transcription dynamics the *frq* promoter.

### Transition from Entrained to Constant Conditions

Transcript levels supported by the *frq* promoters are substantially higher in light than in the dark [33]. We recorded with *frq::luc-PEST* and *frq::luc* reporter strains the transition from light/dark entrained conditions to constant darkness. Luciferase activity of the strains was measured for 4 days in 12 h/12 h LD cycles followed by 3 days in DD. The *frq::luc-PEST* reporter impressively revealed differences in the expression levels and amplitude of *frq* promoter driven expression under entrained and free running conditions (Fig. 2C). Thus, the *luc-PEST* reporter allows analyzing temporal expression profile of the *frq* promoter over an extended time period under varying conditions. In contrast, the rapid shutdown of *frq* transcription after transition from entrained to constant conditions was not resolved by the *frq::luc* strain (Fig. 2C). Due to the slow degradation of the stable LUC that had accumulated at high levels during the preceding light phase the

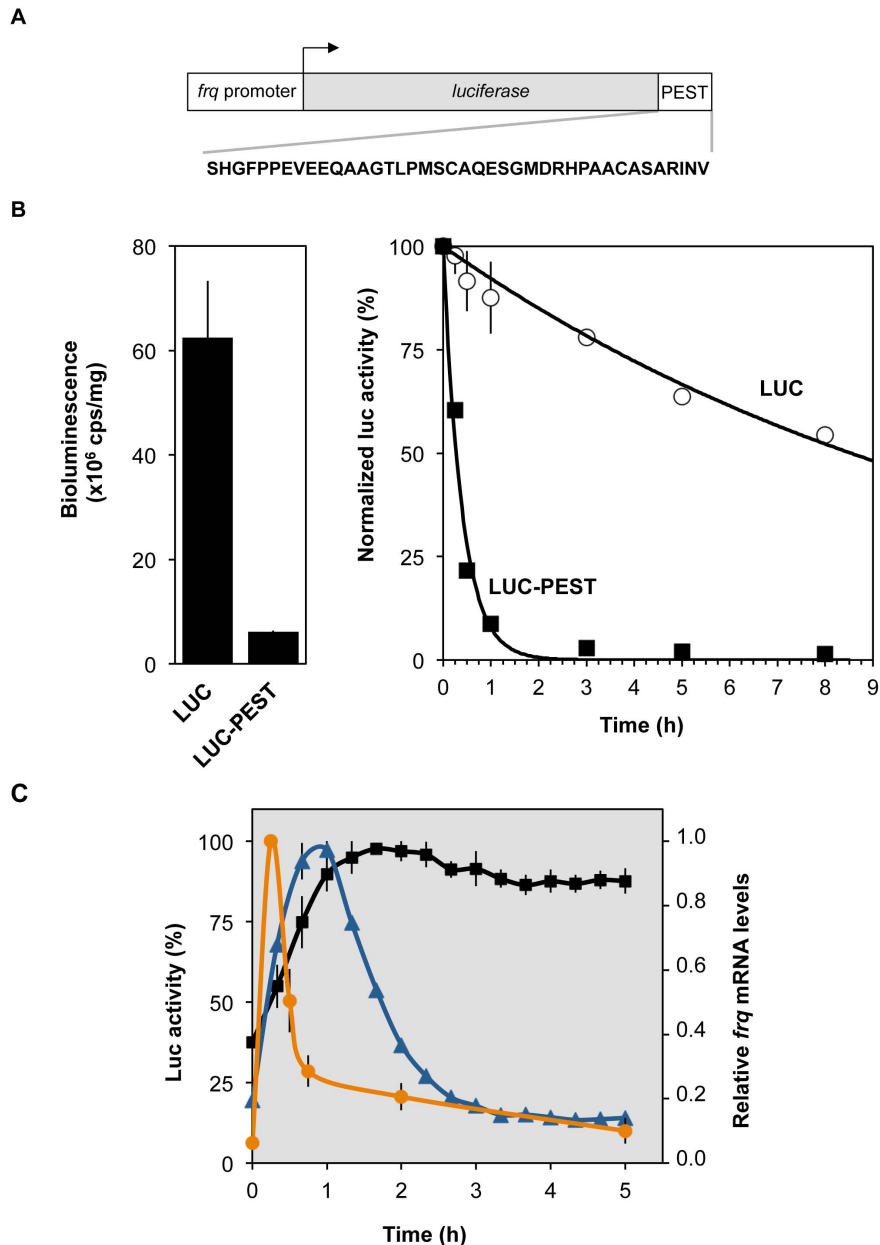

**Figure 1. A PEST signal reduces luciferase stability.** (A) Schematic representation of the luciferase reporter expressed under control of the promoter of the *frequency* gene (*frq* promoter). The coding region of the firefly luciferase has been codon optimized for *Neurospora crassa* expression [19]. The PEST sequence fused to the 3'-end of the luciferase is indicated. The reporter gene was integrated into the genome downstream of the *his-3* locus. (B) A protein stability assay in light grown cells was carried out in the presence of cycloheximide (CHX) to compare the degradation of LUC-PEST and unmodified LUC. Mycelia were grown in liquid culture at 25°C and CHX was added at  $t = 0$  at a final concentration of 10  $\mu\text{g/ml}$ . Cells were harvested at the indicated time points, native protein extracts were prepared and luciferase activity was analyzed as described in Material and Methods. (Left) Absolute bioluminescence levels at  $t = 0$  are shown. (Right) Bioluminescence levels are blotted over time. Levels at  $t = 0$  were set to 100% (Error bars indicate to  $\pm$  SEM,  $n = 3$ ). Exponential trend lines are fitted to the data (values  $< 5\%$  were excluded). (C) Cultures of *frq::luc* (blue line) and *frq::luc-PEST* (orange line), grown in darkness under growth-restricting conditions on solid medium in a 96-well plate, were exposed to a 1 min light pulse and then released into constant darkness. Luciferase activity was recorded *in vivo* for 5 hours in 20 min intervals. *frq* mRNA levels (black line) were determined by qPCR in WT strain grown in liquid medium. Data were normalized by setting the maxima to 100%. (Error bars indicate  $\pm$  SEM,  $n = 3$ ).

doi:10.1371/journal.pone.0083660.g001

free-running *frq* promoter oscillations in DD was almost completely masked.

#### Frq promoter Dynamics in WT versus $\Delta vvd$

VVD determines the phase of the circadian clock by inhibiting the light-activated WCC in particular after light-to-dark transition of *Neurospora* [34]. We analyzed the dynamics of *frq::luc-PEST* expression in a  $\Delta vvd$  ( $\Delta vvd$ ) strain under the same LD and DD

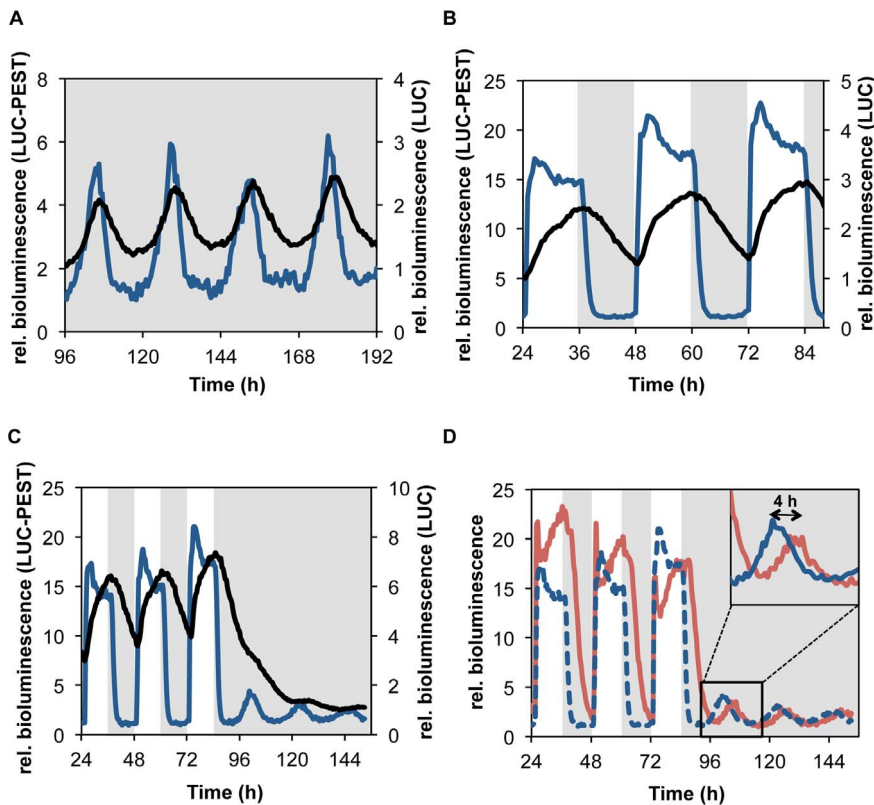

**Figure 2. *frq*-promoter driven *luc*-PEST exhibits high amplitude oscillations.** *frq::luc* (black lines) and *frq::luc*-PEST (blue lines) strains grown in 96-well plates were synchronized with a 1 hour light pulse and luciferase activity was measured every 15 minutes under the indicated conditions: (A) constant darkness (DD), (B) 12 h:12 h light/dark cycles (LD12:12) and (C) 4 days in LD12:12 followed by 3 days in DD. Representative bioluminescence records (starting at day 2) of individual cultures are shown. Data were normalized by setting the minima to 1. (D) The *frq::luc*-PEST reporter conveniently resolves the known differences in transcription dynamics between *WT* (blue) and  $\Delta vvd$  (red) strains. The *frq::luc*-PEST reporter was expressed in a  $\Delta vvd$  strain, which was exposed to the same light-dark regime as above. The *frq::luc*-PEST activity of *WT* grown in the same plate from part (C) is shown again for comparison (dotted line). Insert: magnification showing the  $\sim 4$  h phase delay of  $\Delta vvd$  after release to DD [34]. doi:10.1371/journal.pone.0083660.g002

regime as for *WT*. Following light-to-dark transitions, LUC-PEST activity decreased more slowly in  $\Delta vvd$  than in *WT*, which perpetuated in constant conditions into a 4 h phase delay (Fig. 2D). Hence, considerably small differences in circadian promoter activity are readily and reliably detected by the *luc*-PEST reporter. The high temporal resolution of the *frq::luc*-PEST reporter revealed in addition complex differences between  $\Delta vvd$  and *WT* in the adaptation dynamics of the *frq* promoter during the light phase in (Fig. 2D), which will be further investigated elsewhere.

### Transcription Dynamics in Complex Light Regimes

The blue-light photoreceptor VVD regulates sensory adaptation of *Neurospora* to light by inhibiting the light-activated WCC [17,32,35,36], allowing *Neurospora* to respond to changes in light intensity over several orders of magnitude.

To analyze the temporal dynamics of the *vvd* promoter, we expressed *vvd::luc*-PEST and *vvd::luc* reporters in a *WT* background. Dark-grown conidial cultures of *vvd::luc*-PEST and *vvd::luc* were exposed in 96-well plates to consecutive 15 h light-intensity steps of 0.35  $\mu$ E, 3.5  $\mu$ E and 30  $\mu$ E followed by a final 48 h period in the dark. As shown for *vvd::luc*-PEST, light responses of 20 individual cultures were highly reproducible (Fig. S1A, B). Consistent with *vvd* mRNA data obtained from a similar experimental setup [17], LUC-PEST activity increased sharply after each light step followed by an adaptation phase and approached a rather constant steady-state level that correlated

with light intensity (Fig. 3A). Expression levels dropped rapidly after the subsequent light-to-dark transition and then oscillated at a low level in circadian fashion. The data demonstrates that *Neurospora* quickly responds to increases as well as decreases in light intensity, adjusting expression levels of *vvd* according to ambient light. In contrast, due to the stability of the luciferase, bioluminescence traces of a *vvd::luc* strain failed to resolve the induction and adaptation responses of the *vvd* promoter to the light intensity steps and to the final dark-transition (Fig. 3B).

### Discussion

Destabilized luciferase reporters have been successfully used in a number of circadian as well as non-circadian studies [37,38,39,40,41]. In *Neurospora*, a codon-optimized luciferase has been used as transcriptional reporter of circadian promoter activity and as translational fusion with the FRQ protein to monitor clock protein rhythms [42]. We have shown here that in *Neurospora* firefly luciferase (LUC) activity is stable ( $t_{1/2} \sim 8$  h). The same protein in mammalian cells is turned over significantly faster ( $t_{1/2} \sim 4$  h). Since LUC is a thermo-labile protein, it is likely that the differences in LUC stability are due to the growth temperatures, i.e. 25°C for *Neurospora* and 37°C for mammalian cells. The considerable stability of LUC at 25°C limits its use as transcription reporter, particularly as a reporter of rapid transcription dynamics, in *Neurospora* but presumably also in other

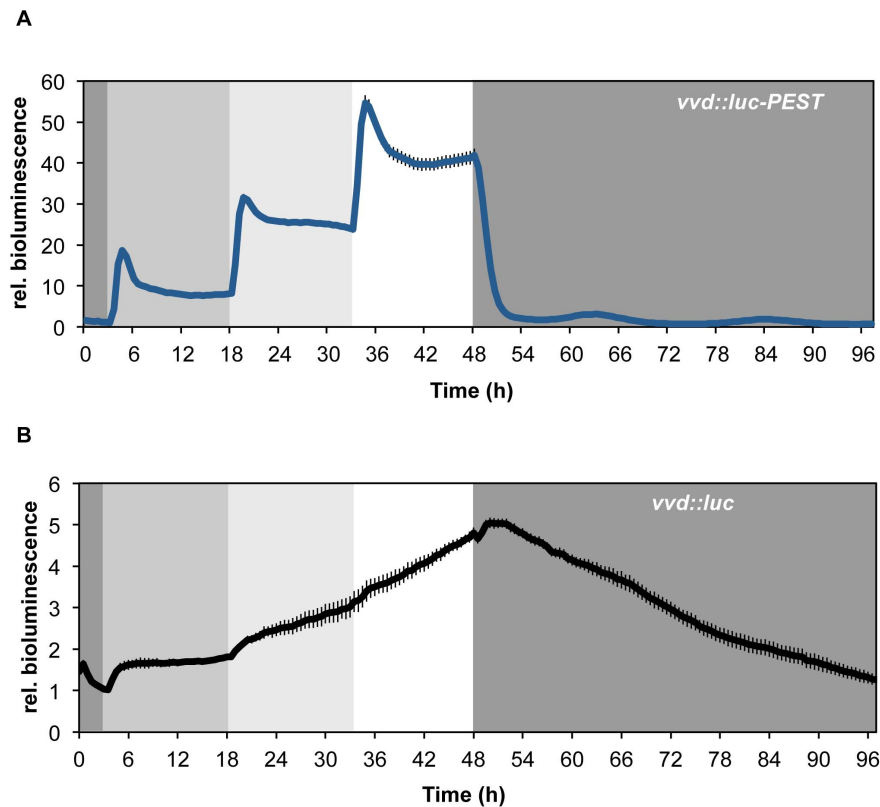

**Figure 3. Light response and adaptation of *vvd*-promoter driven luciferase expression.** *Luc* and *Luc-PEST* were expressed under the control of the *vvd* promoter. Cultures were subjected to three consecutive 15 h light steps with increasing intensity (0.35  $\mu$ E, 3.5  $\mu$ E and 30  $\mu$ E) followed by 48 h of constant darkness. Luciferase activity was measured in 30 min intervals. (A) *vvd::luc-PEST* (n=20) (B) *vvd::luc* (n=4). Error bars indicate  $\pm$  SEM. doi:10.1371/journal.pone.0083660.g003

organisms that grow at lower temperatures. A PEST signal fused to LUC tremendously destabilizes the protein, triggering its degradation in *Neurospora* with a half-time of only  $\sim$ 25 min. The unstable luciferase is a faithful reporter of promoter activity, resolving rapid as well as small changes in gene transcription, which would be masked by a stable LUC reporter. The LUC-PEST reporter system in combination with growth restricted culture conditions makes it possible to record promoter activity *in vivo* over several days. In combination with a plate-reader equipped with an automated stacker, the system is suitable for medium to high throughput promoter analyses in 96-well plate formats. The high-density time course analyses are highly reproducible even under complex physiological regimes (e.g. light-dark cycles or light steps). The system is thus superior to conventional approaches based on labor intensive and rather error-prone quantification of RNA expression by qPCR or Northern analysis.

## References

- Daniels MC, Kansal P, Smith TM, Paterson AJ, Kudlow JE, et al. (1993) Glucose regulation of transforming growth factor- $\alpha$  expression is mediated by products of the hexosamine biosynthesis pathway. *Molecular endocrinology* 7: 1041–1048.
- DiLella AG, Hope DA, Chen H, Trumbauer M, Schwartz RJ, et al. (1988) Utility of firefly luciferase as a reporter gene for promoter activity in transgenic mice. *Nucleic acids research* 16: 4159.
- Morgan LW, Greene AV, Bell-Pedersen D (2003) Circadian and light-induced expression of luciferase in *Neurospora crassa*. *Fungal genetics and biology: FG & B* 38: 327–332.
- Ow DW, Wet DJr, Helinski DR, Howell SH, Wood KV, et al. (1986) Transient and stable expression of the firefly luciferase gene in plant cells and transgenic plants. *Science* 234: 856–859.
- Palomares AJ, DeLuca MA, Helinski DR (1989) Firefly luciferase as a reporter enzyme for measuring gene expression in vegetative and symbiotic *Rhizobium meliloti* and other gram-negative bacteria. *Gene* 81: 55–64.
- Kondo T, Strayer CA, Kulkarni RD, Taylor W, Ishiura M, et al. (1993) Circadian rhythms in prokaryotes: luciferase as a reporter of circadian gene expression in cyanobacteria. *Proceedings of the National Academy of Sciences of the United States of America* 90: 5672–5676.
- Millar AJ, Short SR, Chua NH, Kay SA (1992) A novel circadian phenotype based on firefly luciferase expression in transgenic plants. *The Plant cell* 4: 1075–1087.
- Brandes C, Plautz JD, Stanewsky R, Jamison CF, Straume M, et al. (1996) Novel features of drosophila period Transcription revealed by real-time luciferase reporting. *Neuron* 16: 687–692.

## Supporting Information

**Figure S1 Light response and adaptation of *vvd*-promoter driven luciferase expression is highly reproducible.** Data from the experiment performed in Fig. 3A. 20 separate traces are shown as (A) raw data measured in bioluminescence counts per second (B) normalized data. Traces were normalized to the mean bioluminescence levels of each trace. (PDF)

## Author Contributions

Conceived and designed the experiments: AD FC. Performed the experiments: FC AD. Analyzed the data: AD FC. Contributed reagents/materials/analysis tools: AD FC. Wrote the paper: AD MB.

9. Geusz ME, Fletcher C, Block GD, Straume M, Copeland NG, et al. (1997) Long-term monitoring of circadian rhythms in *c-fos* gene expression from suprachiasmatic nucleus cultures. *Current biology* : CB 7: 758–766.
10. Meroow M, Brunner M (2011) Circadian rhythms. *FEBS letters* 585: 1383.
11. He Q, Cha J, He Q, Lee HC, Yang Y, et al. (2006) CKI and CKII mediate the FREQUENCY-dependent phosphorylation of the WHITE COLLAR complex to close the *Neurospora* circadian negative feedback loop. *Genes Dev* 20: 2552–2565.
12. He Q, Shu H, Cheng P, Chen S, Wang L, et al. (2005) Light-independent phosphorylation of WHITE COLLAR-1 regulates its function in the *Neurospora* circadian negative feedback loop. *J Biol Chem* 280: 17526–17532.
13. Schafmeier T, Haase A, Kaldi K, Scholz J, Fuchs M, et al. (2005) Transcriptional feedback of *Neurospora* circadian clock gene by phosphorylation-dependent inactivation of its transcription factor. *Cell* 122: 235–246.
14. Schafmeier T, Diernfellner A, Schafer A, Dintsis O, Neiss A, et al. (2008) Circadian activity and abundance rhythms of the *Neurospora* clock transcription factor WCC associated with rapid nucleo-cytoplasmic shuttling. *Genes Dev* 22: 3397–3402.
15. Malzahn E, Ciprianidis S, Kaldi K, Schafmeier T, Brunner M (2010) Photoadaptation in *Neurospora* by competitive interaction of activating and inhibitory LOV domains. *Cell* 142: 762–772.
16. Schwerdtfeger C, Linden H (2001) Blue light adaptation and desensitization of light signal transduction in *Neurospora crassa*. *Mol Microbiol* 39: 1080–1087.
17. Gin E, Diernfellner AC, Brunner M, Hofer T (2013) The *Neurospora* photoreceptor VIVID exerts negative and positive control on light sensing to achieve adaptation. *Molecular systems biology* 9: 667.
18. Heintzen C, Loros JJ, Dunlap JC (2001) The PAS protein VIVID defines a clock-associated feedback loop that represses light input, modulates gating, and regulates clock resetting. *Cell* 104: 453–464.
19. Gooch VD, Mehra A, Larrondo LF, Fox J, Touroutoutoudis M, et al. (2008) Fully codon-optimized luciferase uncovers novel temperature characteristics of the *Neurospora* clock. *Eukaryot Cell* 7: 28–37.
20. Koksharov MI, Ugarova NN (2011) Triple substitution G216N/A217L/S398M leads to the active and thermostable *Luciola mingrelica* firefly luciferase. *Photochemical & photobiological sciences* : Official journal of the European Photochemistry Association and the European Society for Photobiology 10: 931–938.
21. Gupta R, Kasturi P, Bracher A, Loew C, Zheng M, et al. (2011) Firefly luciferase mutants as sensors of proteome stress. *Nature methods* 8: 879–884.
22. Thompson JF, Hayes LS, Lloyd DB (1991) Modulation of firefly luciferase stability and impact on studies of gene regulation. *Gene* 103: 171–177.
23. Leclerc GM, Boockfor FR, Faught WJ, Frawley LS (2000) Development of a destabilized firefly luciferase enzyme for measurement of gene expression. *BioTechniques* 29: 590–591, 594–596, 598 passim.
24. Belden WJ, Larrondo LF, Froehlich AC, Shi M, Chen CH, et al. (2007) The band mutation in *Neurospora crassa* is a dominant allele of *ras-1* implicating RAS signaling in circadian output. *Genes Dev* 21: 1494–1505.
25. Aronson BD, Johnson KA, Dunlap JC (1994) Circadian clock locus frequency: protein encoded by a single open reading frame defines period length and temperature compensation. *Proc Natl Acad Sci U S A* 91: 7683–7687.
26. Sancar G, Sancar C, Brugger B, Ha N, Sachsenheimer T, et al. (2011) A global circadian repressor controls antiphasic expression of metabolic genes in *Neurospora*. *Molecular cell* 44: 687–697.
27. Schafmeier T, Kaldi K, Diernfellner A, Mohr C, Brunner M (2006) Phosphorylation-dependent maturation of *Neurospora* circadian clock protein from a nuclear repressor toward a cytoplasmic activator. *Genes Dev* 20: 297–306.
28. Meroow M, Roenneberg T (2007) Circadian entrainment of *Neurospora crassa*. *Cold Spring Harb Symp Quant Biol* 72: 279–285.
29. Roenneberg T, Meroow M (2007) Entrainment of the human circadian clock. *Cold Spring Harb Symp Quant Biol* 72: 293–299.
30. Price-Lloyd N, Elvin M, Heintzen C (2005) Synchronizing the *Neurospora crassa* circadian clock with the rhythmic environment. *Biochem Soc Trans* 33: 949–952.
31. Tan Y, Dragovic Z, Roenneberg T, Meroow M (2004) Entrainment dissociates transcription and translation of a circadian clock gene in *neurospora*. *Curr Biol* 14: 433–438.
32. He Q, Liu Y (2005) Molecular mechanism of light responses in *Neurospora*: from light-induced transcription to photoadaptation. *Genes & development* 19: 2888–2899.
33. Crosthwaite SK, Loros JJ, Dunlap JC (1995) Light-induced resetting of a circadian clock is mediated by a rapid increase in frequency transcript. *Cell* 81: 1003–1012.
34. Elvin M, Loros JJ, Dunlap JC, Heintzen C (2005) The PAS/LOV protein VIVID supports a rapidly dampened daytime oscillator that facilitates entrainment of the *Neurospora* circadian clock. *Genes Dev* 19: 2593–2605.
35. Schafmeier T, Diernfellner AC (2011) Light input and processing in the circadian clock of *Neurospora*. *FEBS letters* 585: 1467–1473.
36. Chen CH, DeMay BS, Gladfelter AS, Dunlap JC, Loros JJ (2010) Physical interaction between VIVID and white collar complex regulates photoadaptation in *Neurospora*. *Proceedings of the National Academy of Sciences of the United States of America* 107: 16715–16720.
37. Robertson JB, Stowers CC, Boczek E, Johnson CH (2008) Real-time luminescence monitoring of cell-cycle and respiratory oscillations in yeast. *Proceedings of the National Academy of Sciences of the United States of America* 105: 17988–17993.
38. Suter DM, Molina N, Gatfield D, Schneider K, Schibler U, et al. (2011) Mammalian genes are transcribed with widely different bursting kinetics. *Science* 332: 472–474.
39. Dolz-Edo L, Rienzo A, Poveda-Huertes D, Pascual-Ahuir A, Proft M (2013) Deciphering dynamic dose responses of natural promoters and single cis elements upon osmotic and oxidative stress in yeast. *Molecular and cellular biology* 33: 2228–2240.
40. Ueda HR, Chen W, Adachi A, Wakamatsu H, Hayashi S, et al. (2002) A transcription factor response element for gene expression during circadian night. *Nature* 418: 534–539.
41. Paguio A, Stecha P, Wood KV, Fan F (2010) Improved dual-luciferase reporter assays for nuclear receptors. *Current chemical genomics* 4: 43–49.
42. Larrondo LF, Loros JJ, Dunlap JC (2012) High-resolution spatiotemporal analysis of gene expression in real time: in vivo analysis of circadian rhythms in *Neurospora crassa* using a FREQUENCY-luciferase translational reporter. *Fungal genetics and biology* : FG & B 49: 681–683.
